1 **The receptor-like kinases BAM1 and BAM2 promote the cell-to-cell movement of miRNA**  
2 **in the root stele to regulate xylem patterning**

3 Pengfei Fan<sup>1,2</sup>, Hua Wang<sup>3</sup>, Hao Xue<sup>1,2</sup>, Tabata Rosas-Diaz<sup>1</sup>, Weihua Tang<sup>3</sup>, Heng Zhang<sup>1</sup>, Lin  
4 Xu<sup>3</sup>, Rosa Lozano-Duran<sup>1\*</sup>

5 <sup>1</sup>Shanghai Center for Plant Stress Biology, CAS Center for Excellence in Molecular Plant  
6 Sciences, Chinese Academy of Sciences, Shanghai 201602, China. <sup>2</sup>University of the Chinese  
7 Academy of Sciences, Beijing 100049, China. <sup>3</sup>National Laboratory of Plant Molecular Genetics,  
8 CAS Center for Excellence in Molecular Plant Sciences, Shanghai Institute of Plant Physiology  
9 and Ecology, Chinese Academy of Sciences, 300 Fenglin Road, Shanghai 200032, China.

10 \*Corresponding author; email address: [lozano-duran@sibs.ac.cn](mailto:lozano-duran@sibs.ac.cn).

11

12 **ABSTRACT**

13 Xylem patterning in the root is established through the creation of opposing gradients of  
14 miRNAs and their targets, enabled by the cell-to-cell spread of the former. The miRNAs involved  
15 in xylem patterning, miR165/6, move through plasmodesmata, but how their trafficking is  
16 regulated remains elusive. Here, we describe that the receptor-like kinases BAM1/2 are  
17 required for the intercellular movement of miR165/6 in the stele and hence proper xylem  
18 patterning in the root.

19

20 **MAIN TEXT**

21 Tissue patterning in plant organ development depends primarily on positional information, which  
22 must be communicated between cells. Different mobile molecules can mediate cell-to-cell  
23 communication, including phytohormones, transcription factors, or peptides. In the past decade,  
24 multiple works have uncovered the relevance of small non-coding RNAs (sRNA) as mobile  
25 signaling molecules capable of acting as morphogens in plant development, determining leaf  
26 polarity, root vascular patterning, embryo meristem formation, female gametogenesis, and  
27 maintenance of the shoot apical meristem, regulating the acquisition of cell fate in a dose-  
28 dependent fashion (reviewed in <sup>1-3</sup>). Interestingly, it has been recently shown that the cell-to-cell  
29 movement of microRNAs (miRNAs) is directional <sup>4</sup>, indicating that this process must be  
30 precisely regulated.

31 An elegant example of how sRNA can determine pattern formation is provided by the study of  
32 xylem patterning in the root. Xylem patterning is established by a robust regulatory pathway  
33 comprising bidirectional cell signaling mediated by miRNAs 165 and 166 (miR165/6) and the  
34 transcription factors SHORT ROOT (SHR) and SCARECROW (SCR)<sup>5</sup>: xylem precursors  
35 differentiate into two types of xylem vessels: metaxylem cells, with pitted secondary cell walls, in  
36 the centre of the vascular cylinder, and protoxylem cells, distinguishable by their spiral walls, in  
37 a peripheral position (Figure 1A). SHR is produced in the steel, and moves from cell to cell to  
38 the endodermis, where it activates SCR and, together with the latter, *MIR165a* and *MIR166b*.  
39 The resulting miR165 and miR166 move into the stele to pattern the *class III HOMEODOMEIN-*  
40 *LEUCIN ZIPPER (HD-ZIP III)* mRNA domains, particularly that of *PHABULOSA (PHB)*,  
41 restricting them to the centre of the stele, which results in correct xylem patterning with  
42 formation of both metaxylem and protoxylem<sup>5,6</sup> (Figure 1A). Although miR165/6 have been  
43 shown to move symplastically through plasmodesmata<sup>7</sup>, how their trafficking is regulated  
44 remains elusive.

45 The plasma membrane- and plasmodesmata-localized receptor-like kinases BARELY ANY  
46 MERISTEM (BAM) 1 and 2 have been recently described as required for the cell-to-cell spread  
47 of RNA interference (RNAi) in the reporter *SUC-SUL* plants<sup>8</sup>, in which production of mobile  
48 siRNA against the endogenous *SULPHUR (SUL)* gene in phloem companion cells causes non-  
49 cell autonomous silencing observable as a chlorotic phenotype around the leaf veins<sup>9</sup>. Whether  
50 BAM1/2 also play a role in the cell-to-cell movement of other sRNAs, such as miRNAs, is yet to  
51 be determined.

52 In *Arabidopsis* roots, *BAM1* is strongly and specifically expressed in the stele (Figure S1). We  
53 hypothesized that, considering this particular expression pattern, if BAM1 regulates movement  
54 of miRNA, it could mediate the cell-to-cell spread of miR165/6, hence acting as a regulator of  
55 xylem patterning. In order to determine whether BAM1/2 are required for correct xylem  
56 formation in the root, we observed xylem patterning in *bam1/2* mutants<sup>9,10</sup>. Interestingly, *bam1*  
57 *bam2* double mutants, but not *bam1* or *bam2* single mutants, display shorter roots (Figure S2)  
58 and show xylem defects consistent with a malfunction of miR165/6, namely absence of  
59 protoxylem files and overproliferation of metaxylem at the expense of protoxylem (Figure 1B  
60 and C; Figure S3). At the molecular level, *bam1 bam2* mutants display increased levels of *HD-*  
61 *ZIP III* transcripts, but are not affected in the expression of *MIR165/166*, *SHR*, or *SCR*, or in the  
62 accumulation of miR165/6 (Figure 1D-F; Figure S4). Further supporting the idea that movement  
63 of miR165/6 is affected in the double mutants, the distribution of the *PHB* transcript is less

64 restricted in the stele in the absence of BAM1/2 (Figure 1G), while lower levels of miR166 can  
65 be detected in this area (Figure 1H). On the contrary, transgenic plants overexpressing *BAM1*  
66 have normal xylem and wild type-like accumulation of the *HD-ZIP III* transcripts (Figure S5).  
67 Taken together, these results indicate that BAM1/2 are required for proper xylem patterning,  
68 likely due to a function as positive regulators of the cell-to-cell movement of miR165/6.

69 The C4 protein from the geminivirus *Tomato yellow leaf curl virus* (TYLCV) interacts with the  
70 intracellular domain of BAM1/2 at the plasma membrane and has a negative impact on the cell-  
71 to-cell spread of RNAi<sup>9</sup>. In order to see whether the activity of C4 can have an effect of xylem  
72 patterning, we observed the xylem in roots of transgenic plants expressing C4 under the control  
73 of the constitutive 35S promoter<sup>9</sup>. Strikingly, expression of C4 led to xylem defects similar to  
74 those observed in *bam1 bam2* mutants (Figure 2A and B). Plasma membrane localization of C4  
75 is essential for this phenotype, since plants expressing the mutated version C4<sub>G2A</sub>, which loses  
76 its membrane association and localizes to chloroplasts exclusively<sup>9</sup>, have wild type-like xylem  
77 (Figure S6). Transgenic plants expressing C4, but not C4<sub>G2A</sub>, have increased levels of *HD-ZIP*  
78 *III* transcripts (Figure 2C, Figure S6). However, C4 does not affect the expression of *MIR166*,  
79 *SHR*, or *SCR*, or the accumulation of miR165/6 (Figure 2D and E; Figure S7). As observed for  
80 *bam1 bam2* mutants, the distribution of the *PHB* transcript in the stele is broader in the C4-  
81 expressing plants (Figure 2F), and lower levels of miR166 are detected in this part of the root  
82 (Figure 2F).

83 Since miR165/6 are produced in the endodermis, and from here traffic inwards into the stele  
84 establishing a gradient that determines *HD-ZIP III* dosage<sup>5</sup>, we reasoned that if C4 is exerting  
85 its effect on xylem patterning through the interference with the cell-to-cell movement of miRNAs,  
86 then expressing C4 in the endodermis layer should have a non-cell autonomous effect and be  
87 sufficient to cause the observed phenotype. Indeed, transgenic plants expressing C4 under the  
88 control of the endodermis-specific *SCR* promoter display xylem patterning and related molecular  
89 phenotypes similar to those previously described for *bam1 bam2* and 35S:C4 transgenic lines  
90 (Figure 2A-D; Figure S7), including a wider *PHB* domain and lower miR166 in the root stele  
91 (Figure 2F, G). Moreover, despite its localization in plasmodesmata<sup>9</sup>, C4 does not disturb the  
92 movement of SHR-GFP (Figure S8). Therefore, C4 interferes with xylem patterning non-cell-  
93 autonomously, most likely through an impairment of miR165/6 movement. Of note, transgenic  
94 plants expressing C4 under the *SCR* promoter display wild type-like rosettes, but abnormal  
95 floral stems (Figure S9).

96 Recently, BAM1 was shown to act as a receptor for the CLE9/10 peptides to regulate periclinal  
97 cell division of xylem precursor cells <sup>11</sup>. The results presented here unveil an additional, novel,  
98 redundant role of BAM1 and BAM2 in the regulation of xylem cell fate in the root stele. *bam1*  
99 *bam2* double mutants display defects in xylem patterning, which are mimicked cell-  
100 autonomously and non-cell-autonomously by the expression of the viral BAM1/2-interactor C4;  
101 however, all regulatory steps occurring upstream of the cell-to-cell movement of miR165/6 are  
102 unaltered in the absence of BAM1/2 or in the presence of C4. Despite normal accumulation of  
103 miR165/6, the action of these miRNAs on their target *PHB* is compromised in *bam1 bam2*  
104 mutant or C4 transgenic lines, which correlates with a reduced distribution of miR166 in the root  
105 stele, underpinning the observed defective xylem patterning. Therefore, BAM1 and BAM2 seem  
106 to promote the cell-to-cell movement of both siRNA <sup>9</sup> and miRNA, an activity targeted by the  
107 viral effector C4; whether their role in sRNA-mediated intercellular communication underlies  
108 other biological functions of BAM1/2 remains to be determined.

109 Although our results provide novel insight into the mechanisms enabling the cell-to-cell  
110 movement of sRNA, which virtually impacts every aspect of plant biology, our current view of  
111 this process is still extremely limited and multiple questions remain to be answered. For  
112 example, whether sRNA travel in a free form or associated to proteins, or how directionality of  
113 the movement, if required, is accomplished, are long-standing questions. The elucidation of how  
114 BAM1/2 exert their role on the intercellular spread of sRNA at the molecular and cellular levels  
115 may shed light on these and other still elusive matters. However, it must be kept in mind that  
116 BAM1/2 are likely not the only proteins mediating the cell-to-cell movement of sRNA in plants:  
117 considering the restricted expression pattern of *BAM1/2*, together with the limited developmental  
118 phenotypes of the *bam1 bam2* double mutants, additional molecular mechanisms must regulate  
119 this process outside the *BAM1/2* expression domains.

120

## 121 **METHODS**

### 122 **Plant materials and growth conditions**

123 Mutants and transgenic plants used in this study are summarized in Table S1. Seedlings used  
124 for quantitative RT-PCR (qRT-PCR) and xylem phenotype analysis were grown on half strength  
125 Murashige and Skoog (1/2MS) medium containing 1% sucrose and 1% agar. Plates were  
126 placed vertically in a growth chamber with a photoperiod of 16 h light/8 h dark at 22°C. *SCR:C4*

127 plants used for phenotyping were grown in soil under the same environmental conditions  
128 described above.

129

### 130 **Real-time quantitative RT-PCR (qRT-PCR)**

131 For real-time quantitative RT-PCR (qRT-PCR), total RNA was extracted using Plant RNA Kit  
132 (Omega, USA) and reverse-transcribed by First Chain cDNA Synthesis Kit (TonkBio, China).  
133 qPCR was performed using C1000 Touch Thermal Cycler (Bio-Rad, USA); 20µl of PCR reaction  
134 mixture contained 10µl of SYBR Green mix (Bio-Rad, USA), 1µl of primer mix (10µM), 1µl  
135 reverse-transcribed product and 8µl of water. *ACTIN* (*ACT2*) was used as normalizer. Data  
136 were analyzed using the  $2^{-\Delta\Delta CT}$  method. To quantify the accumulation of miR166, stem-loop  
137 qPCR was conducted as previously described<sup>12</sup>. All primers used for qPCR are listed in Table  
138 S2.

139

### 140 **Constructs and generation of transgenic lines**

141 To generate the pSCR:C4 construct, the coding sequence of C4 was cloned into pENTR/D-  
142 TOPO (Invitrogen, USA), and subsequently Gateway-cloned into the pSCR:GW vector<sup>13</sup>  
143 through an LR reaction (Invitrogen, USA). *A. thaliana* plants were transformed using the floral  
144 dipping method<sup>14</sup>.

145

### 146 **In situ hybridization**

147 In situ hybridization was performed as previously described<sup>15,16</sup>. The probe for *PHB* detection  
148 was cloned into the pGEM-T Easy vector (Promega, USA), using the primers listed in Table S2.  
149 For microRNA in situ hybridization, a specific miR166 LNA probe (QIAGEN, Germany) was  
150 used. 100 ng probe were used per slide. The hybridization temperature was 52°C for *PHB*  
151 detection, and 58°C for miR166 detection.

152

### 153 **Small RNA (sRNA) sequencing**

154 Small-RNA (sRNA) data analyses were performed using a pipeline previously described<sup>17</sup>.  
155 Briefly, raw reads were trimmed using trim\_galore v0.4.0 ([https://www.  
156 bioinformatics.babraham.ac.uk/projects/trim\\_galore/](https://www.bioinformatics.babraham.ac.uk/projects/trim_galore/)) to remove the adapter sequences and  
157 bases that have a quality score lower than 10. Reads that could not be aligned to structural  
158 RNA sequences (rRNA, tRNA, snoRNA, snRNA, etc.) were aligned to the TAIR10 genome  
159 using Burrows–Wheeler aligner by allowing one mismatch per read<sup>17</sup>. The Tair10 genome was  
160 divided into non-overlapping 200-bp bins. The number of sRNA reads (with different lengths) in

161 each 200-bp bin or specific genes were summarized and normalized to the structural RNA-  
162 removed library size (reads per 10 million) using bedtools v2.26.0  
163 (<https://bedtools.readthedocs.io/en/latest/>). Results from two independent transgenic lines per  
164 construct were pooled.

165

### 166 **Confocal imaging**

167 All confocal images were acquired using a Leica TCS SP8 point scanning confocal microscope.  
168 For basic fuchsin staining, 5- or 6-day-old seedlings were first treated with 1M KOH solution for  
169 6 hours at 37°C. Seedlings were then stained with 0.01% basic fuchsin solution in water for 5  
170 minutes, and subsequently destained in 70% ethanol for 10 minutes. To check *BAM1*  
171 expression pattern and SHR-GFP movement in the root tip, 5-day-old seedlings were imaged  
172 after propidium iodide (PI) staining. The settings used for the laser scanning are as follows:  
173 Ex:561nm, Em:600-700nm for basic fuchsin staining; Ex:488nm, Em:500-550nm for GFP;  
174 Ex:514nm, Em:525-570nm for YFP; Ex:561nm, Em:630-680 nm for PI staining.

175

### 176 **ACKNOWLEDGEMENTS**

177 The authors thank Steven Clark and Zachary Nimchuk for kindly sharing materials; Wenjie Zeng,  
178 Xinyu Jian, Aurora Luque, and Yujing (Ada) Liu for technical assistance; and all members in  
179 Rosa Lozano-Duran's and Alberto Macho's groups for stimulating discussions and helpful  
180 suggestions. This research was supported by the Strategic Priority Research Program of the  
181 Chinese Academy of Sciences, Grant No. XDB27040206, and by the National Natural Science  
182 Foundation of China (NSFC) (grant numbers 31671994 and 31870250). Research in RL-D's lab  
183 is funded by the Shanghai Center for Plant Stress Biology of the Chinese Academy of Sciences  
184 and the 100 Talent program of the Chinese Academy of Sciences. We apologize to authors of  
185 relevant primary research works that could not be directly cited in this manuscript due to length  
186 restrictions.

187

### 188 **REFERENCES**

189 1 Furuta, K., Lichtenberger, R. & Helariutta, Y. The role of mobile small RNA species  
190 during root growth and development. *Current opinion in cell biology* **24**, 211-216,  
191 doi:10.1016/j.ceb.2011.12.005 (2012).



- 192 2 Hisanaga, T., Miyashima, S. & Nakajima, K. Small RNAs as positional signal for pattern  
193 formation. *Current opinion in plant biology* **21**, 37-42, doi:10.1016/j.pbi.2014.06.005  
194 (2014).
- 195 3 Skopelitis, D. S., Husbands, A. Y. & Timmermans, M. C. Plant small RNAs as  
196 morphogens. *Current opinion in cell biology* **24**, 217-224, doi:10.1016/j.ceb.2011.12.006  
197 (2012).
- 198 4 Skopelitis, D. S. *et al.* Gating of miRNA movement at defined cell-cell interfaces governs  
199 their impact as positional signals. *Nature communications* **9**, 3107, doi:10.1038/s41467-  
200 018-05571-0 (2018).
- 201 5 Carlsbecker, A. *et al.* Cell signalling by microRNA165/6 directs gene dose-dependent  
202 root cell fate. *Nature* **465**, 316-321, doi:10.1038/nature08977 (2010).
- 203 6 Miyashima, S., Koi, S., Hashimoto, T. & Nakajima, K. Non-cell-autonomous  
204 microRNA165 acts in a dose-dependent manner to regulate multiple differentiation  
205 status in the Arabidopsis root. *Development* **138**, 2303-2313, doi:10.1242/dev.060491  
206 (2011).
- 207 7 Vaten, A. *et al.* Callose biosynthesis regulates symplastic trafficking during root  
208 development. *Developmental cell* **21**, 1144-1155, doi:10.1016/j.devcel.2011.10.006  
209 (2011).
- 210 8 Himber, C., Dunoyer, P., Moissiard, G., Ritzenthaler, C. & Voinnet, O. Transitivity-  
211 dependent and -independent cell-to-cell movement of RNA silencing. *The EMBO journal*  
212 **22**, 4523-4533, doi:10.1093/emboj/cdg431 (2003).
- 213 9 Rosas-Diaz, T. *et al.* A virus-targeted plant receptor-like kinase promotes cell-to-cell  
214 spread of RNAi. *Proceedings of the National Academy of Sciences of the United States*  
215 *of America* **115**, 1388-1393, doi:10.1073/pnas.1715556115 (2018).
- 216 10 DeYoung, B. J. *et al.* The CLAVATA1-related BAM1, BAM2 and BAM3 receptor kinase-  
217 like proteins are required for meristem function in Arabidopsis. *The Plant journal : for cell*  
218 *and molecular biology* **45**, 1-16, doi:10.1111/j.1365-313X.2005.02592.x (2006).
- 219 11 Qian, P. *et al.* The CLE9/10 secretory peptide regulates stomatal and vascular  
220 development through distinct receptors. *Nature plants* **4**, 1071-1081,  
221 doi:10.1038/s41477-018-0317-4 (2018).
- 222 12 Varkonyi-Gasic, E., Wu, R., Wood, M., Walton, E. F. & Hellens, R. P. Protocol: a highly  
223 sensitive RT-PCR method for detection and quantification of microRNAs. *Plant methods*  
224 **3**, 12, doi:10.1186/1746-4811-3-12 (2007).

- 225 13 Michniewicz, M., Frick, E. M. & Strader, L. C. Gateway-compatible tissue-specific  
226 vectors for plant transformation. *BMC research notes* **8**, 63, doi:10.1186/s13104-015-  
227 1010-6 (2015).
- 228 14 Zhang, X., Henriques, R., Lin, S. S., Niu, Q. W. & Chua, N. H. Agrobacterium-mediated  
229 transformation of *Arabidopsis thaliana* using the floral dip method. *Nature protocols* **1**,  
230 641-646, doi:10.1038/nprot.2006.97 (2006).
- 231 15 Li, H. *et al.* The Putative RNA-dependent RNA polymerase RDR6 acts synergistically  
232 with ASYMMETRIC LEAVES1 and 2 to repress BREVIPEDICELLUS and  
233 MicroRNA165/166 in *Arabidopsis* leaf development. *The Plant cell* **17**, 2157-2171,  
234 doi:10.1105/tpc.105.033449 (2005).
- 235 16 Yao, X., Huang, H. & Xu, L. In situ detection of mature miRNAs in plants using LNA-  
236 modified DNA probes. *Methods in molecular biology* **883**, 143-154, doi:10.1007/978-1-  
237 61779-839-9\_11 (2012).
- 238 17 Li, H. & Durbin, R. Fast and accurate short read alignment with Burrows-Wheeler  
239 transform. *Bioinformatics* **25**, 1754-1760, doi:10.1093/bioinformatics/btp324 (2009).

240

## 241 FIGURE LEGENDS

242 **Figure 1. BAM1 and BAM2 play a redundant role in xylem development through the**  
243 **promotion of the cell-to-cell movement of miR165/6.** **A.** Schematic representations of a  
244 cross-section of the *Arabidopsis* root stele surrounded by the endodermis, distribution of  
245 miR165/6 and *HD-ZIP III* transcripts, and typical structure of protoxylem (P) and metaxylem (M)  
246 in a longitudinal section of the root; on the right, confocal image of a longitudinal section of the  
247 root showing basic fuchsin-stained protoxylem (P) and metaxylem (M), and bright field image of  
248 the same region. Scale bar = 3µm. **B.** Confocal micrographs of basic fuchsin-stained xylem in  
249 control and *bam1 bam2* six-day-old roots. Empty arrowheads indicate protoxylem; filled  
250 arrowheads indicate metaxylem. WT: wild type (*Ler*); S-S: *SUC:SUL*; EV: empty vector. Scale  
251 bar = 3µm. **C.** Quantification of the number of protoxylem (PX) and metaxylem files (MX) in the  
252 roots of listed genotypes. **D, E.** Accumulation of transcripts of the *HD-ZIP III* family genes (**D**),  
253 transcripts of *MIR166*, and miR166 (**E**) in WT and *bam1-3 bam2-3* double mutant six-day-old  
254 seedlings as measured by qRT-PCR. Results are the average of three biological replicates.  
255 Error bars indicate SD. **F.** miR165/6 accumulation in *S-S/bam1 bam2* double mutants and *SUC-*  
256 *SUL/EV* control as measured by sRNA-seq. **G.** *In situ* hybridization with a *PHB* mRNA specific  
257 probe on cross-sections of WT and *bam1-3 bam2-3* roots. Seven roots were checked per



258 genotype; all roots showed a similar phenotype. One representative picture is shown. **H.** *In situ*  
259 hybridization with a miRNA166-specific LNA probe on cross-sections of WT, *bam1-3 bam2-3*  
260 roots. Ten roots were checked per genotype; five *bam1-3 bam2-3* roots showed the miR166  
261 distribution pattern displayed in this figure, with weaker signal in the stele. Scale bar = 6µm.  
262 Asterisks indicate the position of the endodermis.

263

264 **Figure 2. Ubiquitous or endodermis-specific expression of the viral BAM1/2 interactor C4**  
265 **interferes with the cell-to-cell movement of miR165/6 and xylem development.** **A.** Confocal  
266 micrographs of basic fuchsin-stained xylem in WT, 35S:C4, and SCR:C4 five-day-old roots.  
267 Empty arrowheads indicate protoxylem; filled arrowheads indicate metaxylem. Scale bar = 4µm.  
268 **B.** Quantification of the number of protoxylem (PX) and metaxylem files (MX) in the roots of  
269 listed genotypes. **C, D.** Accumulation of transcripts of the *HD-ZIPIII* family genes (**C**), and  
270 miR166 (**E**) in eleven-day-old WT or 35S:C4 seedlings and in five-day-old WT or SCR:C4  
271 seedlings as measured by qRT-PCR. Results are the average of three biological replicates.  
272 Error bars indicate SD. **E.** miR165/6 accumulation in S-S/35S:C4 and S-S/EV control as  
273 measured by sRNA-seq. **F.** *In situ* hybridization with a *PHB* mRNA specific probe on cross-  
274 sections of WT, 35S:C4, and SCR:C4 roots. Five 35S:C4 roots and eight SCR:C4 roots were  
275 checked, together with the same number of WT roots; all roots showed a similar phenotype.  
276 One representative picture is shown. **G.** *In situ* hybridization with a miRNA166-specific LNA  
277 probe on cross-sections of WT, 35S:C4, and SCR:C4 roots. Thirteen 35S:C4 roots and  
278 seventeen SCR:C4 roots were checked; five 35S:C4 roots and seven SCR:C4 roots showed the  
279 miR166 distribution pattern displayed in this figure, with weaker signal in the stele. Scale bar =  
280 6µm. Asterisks indicate the position of endodermis.

281

282

283 **SUPPLEMENTARY MATERIAL**

284 **Supplementary figure 1. Expression pattern of *BAM1* in the root. A, B.** Propidium iodide-  
285 stained root of a six-day-old transgenic *pBAM1:YFP-NLS* Arabidopsis seedlings. Scale bar = 10  
286  $\mu\text{m}$  (A), 20  $\mu\text{m}$  (B). Asterisks indicate the position of the endodermis. Arrowheads indicate xylem  
287 cell files. **C.** Tissue-specific expression of *BAM1* and *BAM2* in roots (images taken from the  
288 Arabidopsis eFP browser).

289  
290 **Supplementary figure 2. *bam1 bam2* double mutants display short roots. A, B.** Six-day-old  
291 seedlings of *bam1-3 bam2-3* double mutants (A) or *SUC:SUL/bam1 bam2* (lines 1.8 and 1.41)  
292 (B) and their respective controls. WT: wild type (*Ler*); S-S: *SUC:SUL*; EV: empty vector. Scale  
293 bar = 0.5cm.

294  
295 **Supplementary figure 3. *bam1* and *bam2* single mutants have normal xylem. A-D.** Basic  
296 fuchsin-stained xylem of six-day-old Col-0 WT (A), *bam1-3* (B), *Ler* WT (C) and *bam2-3* (D).  
297 Scale bar = 4 $\mu\text{m}$ .

298  
299 **Supplementary figure 4. Expression of *SCR* and *SHR* is not reduced in the *bam1 bam2***  
300 **double mutant.** Accumulation of *SHR* and *SCR* transcripts in six-day-old *bam1-3 bam2-3*  
301 double mutant roots compared to the WT (*Ler*) control, as measured by qRT-PCR. Results are  
302 the mean of three biological replicates; error bars indicate SD.

303  
304 **Supplementary figure 5. Overexpression of *BAM1* has no effect on xylem development.**  
305 **A.** Accumulation of *BAM1* and *BAM2* (left) and *HD-ZIPIII* family genes (right) transcripts in roots  
306 of WT (Col-0) and *35S:BAM1-GFP* eleven-day-old seedlings, as measured by qRT-PCR.  
307 Results are the mean of three biological replicates; error bars represent SD. **B.** Basic fuchsin-  
308 stained xylem of WT (Col-0) and *35S:BAM1-GFP* six-day-old roots. Scale bar = 4 $\mu\text{m}$ .

309  
310 **Supplementary figure 6. *C4<sub>G2A</sub>* has no effect on xylem development. A.** Accumulation of  
311 *HD-ZIPIII* family genes transcripts in WT (Col-0) and *35S:C4<sub>G2A</sub>* eleven-day-old seedlings as  
312 measured by qRT-PCR. Results are the mean of three biological replicates; error bars represent  
313 SD. This experiment was performed together with that shown in Fig. 2C and shares the same  
314 control. **B.** Quantification of the number of protoxylem (PX) and metaxylem files (MX) in the  
315 roots of 5-day-old *35S:C4<sub>G2A</sub>* seedlings. This experiment was performed together with that  
316 shown in Fig. 2B and shares the same control.

317  
318 **Supplementary figure 7. Expression of *SCR* and *SHR* is not reduced in transgenic plants**  
319 **expressing *C4*.** **A, B.** Accumulation of *SHR* and *SCR* transcripts in roots of eleven-day-old  
320 *35S:C4* and *35S:C4<sub>G2A</sub>* seedlings (**A**), or five-day-old *SCR:C4* seedlings (**B**) compared to the  
321 WT (Col-0) control as measured by qRT-PCR. Results are the mean of three biological  
322 replicates; error bars indicate SD. **C, D.** Accumulation of *MIR166A/B* transcripts in eleven-day-  
323 old *35S:C4* and *35S:C4<sub>G2A</sub>* roots (**C**), or in five-day-old *SCR:C4* seedlings (**D**) compared to the  
324 WT (Col-0) control as measured by qRT-PCR. Results are the mean of three biological  
325 replicates; error bars indicate SD.

326  
327 **Supplementary figure 8. *C4* does not affect *SHR* movement.** **A-C.** Localization of *SHR*-GFP  
328 in transgenic *SHR:SHR-GFP* five-day-old roots in the absence (WT) (**A**) or presence of *SCR:C4*  
329 (lines 2 and 18) (**B, C**). Scale bar = 20µm. Asterisks indicate the position of the endodermis.

330  
331 **Supplementary figure 9. Developmental phenotypes of *SCR:C4* plants.** **A.** Flowering six-  
332 week-old plants grown in long day conditions. **B.** Rosettes of four-week-old plants grown in long  
333 day conditions. **C.** Representative flowers and siliques. **D.** Typical floral stem. **E-G.**  
334 Quantification of stem length (**E**), branch length (**F**), and branch angle (**G**) in WT (Col-0) and  
335 *SCR:C4* plants. n=3. Asterisks indicate a statistically significant difference (\*\*\*, p-value <  
336 0.0001; \*\*, p-value <0.003; \*, p-value <0.05), according to a Dunnett test. Scale bar = 2cm.

337  
338 **Table S1. Plant material used in this study.**

339 **Table S2. Primers used in this study.**

340 **Supplementary references.**

341

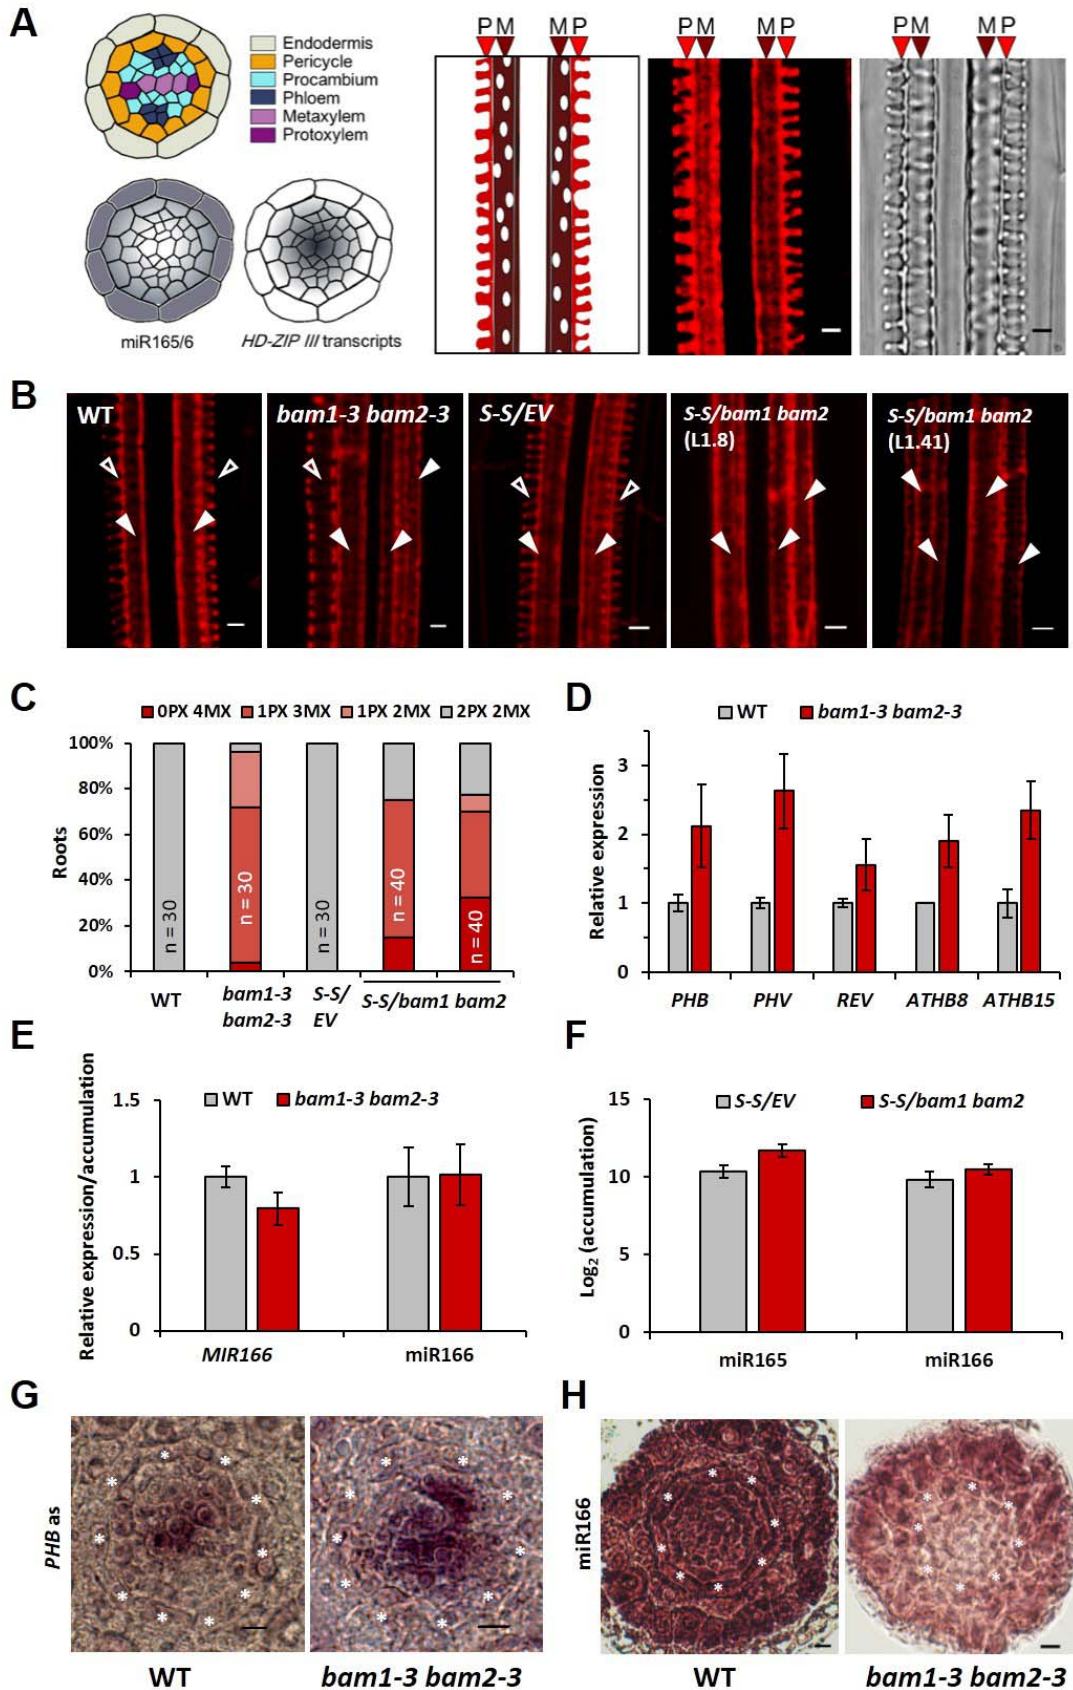



344 **Figure 1. BAM1 and BAM2 play a redundant role in xylem development through the**  
345 **promotion of the cell-to-cell movement of miR165/6.** **A.** Schematic representations of a  
346 cross-section of the Arabidopsis root stele surrounded by the endodermis, distribution of  
347 miR165/6 and *HD-ZIP III* transcripts, and typical structure of protoxylem (P) and metaxylem (M)  
348 in a longitudinal section of the root; on the right, confocal image of a longitudinal section of the  
349 root showing basic fuchsin-stained protoxylem (P) and metaxylem (M), and bright field image of  
350 the same region. Scale bar = 3µm. **B.** Confocal micrographs of basic fuchsin-stained xylem in  
351 control and *bam1 bam2* six-day-old roots. Empty arrowheads indicate protoxylem; filled  
352 arrowheads indicate metaxylem. WT: wild type (*Ler*); S-S: *SUC:SUL*; EV: empty vector. Scale  
353 bar = 3µm. **C.** Quantification of the number of protoxylem (PX) and metaxylem files (MX) in the  
354 roots of listed genotypes. **D, E.** Accumulation of transcripts of the *HD-ZIP III* family genes (**D**),  
355 transcripts of *MIR166*, and miR166 (**E**) in WT and *bam1-3 bam2-3* double mutant six-day-old  
356 seedlings as measured by qRT-PCR. Results are the average of three biological replicates.  
357 Error bars indicate SD. **F.** miR165/6 accumulation in *S-S/bam1 bam2* double mutants and *SUC-*  
358 *SUL/EV* control as measured by sRNA-seq. **G.** *In situ* hybridization with a *PHB* mRNA specific  
359 probe on cross-sections of WT and *bam1-3 bam2-3* roots. Seven roots were checked per  
360 genotype; all roots showed a similar phenotype. One representative picture is shown. **H.** *In situ*  
361 hybridization with a miRNA166-specific LNA probe on cross-sections of WT, *bam1-3 bam2-3*  
362 roots. Ten roots were checked per genotype; five *bam1-3 bam2-3* roots showed the miR166  
363 distribution pattern displayed in this figure, with weaker signal in the stele. Scale bar = 6µm.  
364 Asterisks indicate the position of the endodermis.  
365



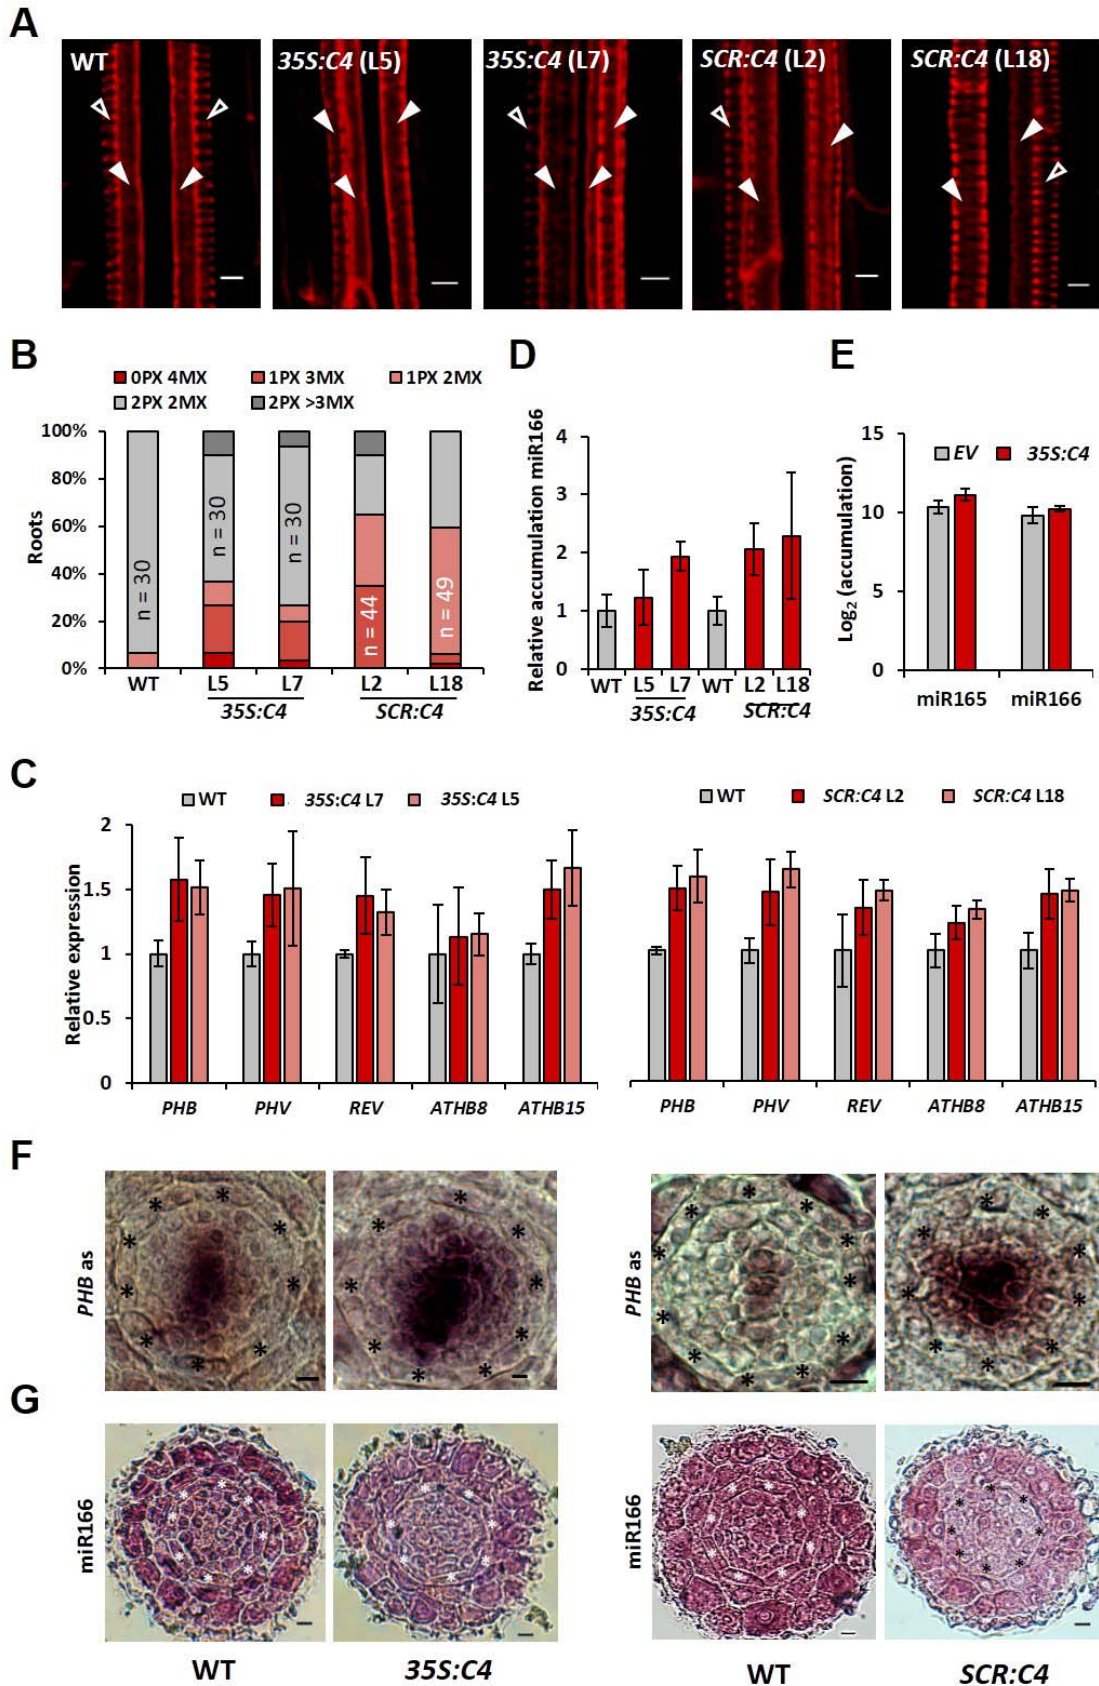

367 **Figure 2. Ubiquitous or endodermis-specific expression of the viral BAM1/2 interactor C4**  
368 **interferes with the cell-to-cell movement of miR165/6 and xylem development.** **A.** Confocal  
369 micrographs of basic fuchsin-stained xylem in WT, 35S:C4, and SCR:C4 five-day-old roots.  
370 Empty arrowheads indicate protoxylem; filled arrowheads indicate metaxylem. Scale bar = 4µm.  
371 **B.** Quantification of the number of protoxylem (PX) and metaxylem files (MX) in the roots of  
372 listed genotypes. **C, D.** Accumulation of transcripts of the *HD-ZIPIII* family genes (**C**), and  
373 miR166 (**E**) in eleven-day-old WT or 35S:C4 seedlings and in five-day-old WT or SCR:C4  
374 seedlings as measured by qRT-PCR. Results are the average of three biological replicates.  
375 Error bars indicate SD. **E.** miR165/6 accumulation in S-S/35S:C4 and S-S/EV control as  
376 measured by sRNA-seq. **F.** *In situ* hybridization with a *PHB* mRNA specific probe on cross-  
377 sections of WT, 35S:C4, and SCR:C4 roots. Five 35S:C4 roots and eight SCR:C4 roots were  
378 checked, together with the same number of WT roots; all roots showed a similar phenotype.  
379 One representative picture is shown. **G.** *In situ* hybridization with a miRNA166-specific LNA  
380 probe on cross-sections of WT, 35S:C4, and SCR:C4 roots. Thirteen 35S:C4 roots and  
381 seventeen SCR:C4 roots were checked; five 35S:C4 roots and seven SCR:C4 roots showed the  
382 miR166 distribution pattern displayed in this figure, with weaker signal in the stele. Scale bar =  
383 6µm. Asterisks indicate the position of endodermis.  
384
